# Supplementary material for: Lipidic Liquid Crystalline Cubic Phases and Magnetocubosomes as Methotrexate Carriers
Source: MDPI journal article supplement (doi:10.3390/nano9040636), 2019-04-19
Supplement: s1 [file s1]

\* Corresponding author: [bilewicz@chem.uw.edu.pl](mailto:bilewicz@chem.uw.edu.pl)

**MTX**

**FA**

Size of the water channels was calculated using the lattice parameter and the composition of cubic phases:

$$\phi_w = \frac{C_w}{C_w + (1 - C_w) \frac{\rho_w}{\rho_l}} \quad (5)$$

where  $\phi_w$ : water volume fraction,  $C_w$ : water weight fraction,  $\rho_w$ : density of water = 0.997 g/cm<sup>3</sup>,  $\rho_l$ : density of lipid, in our case  $\rho_{MO}$  = 0.942 g/cm<sup>3</sup>.

Lipid volume fraction was determined from the equation:

$$\phi_l = 1 - \phi_w \quad (6)$$

Lipid chain length ( $l$ ) was determined by solving the following equation [2]:

$$\phi_{lipid} = 2\delta \left(\frac{l}{a}\right) + \frac{4}{3}\pi\chi \left(\frac{l}{a}\right)^3 \quad (7)$$

$\delta$ : ratio of the minimal surface in a unit cell to the quantity (unit cell volume)<sup>2/3</sup>,  $\chi$ : Euler–Poincaré characteristic,  $a$ : lattice parameter of corresponding phase,  $l$ : lipid chain length/monolayer thickness.

Radius of water channels -  $r_w$  was obtained by equation [3]:

$$r_w = \left(\frac{-\delta}{2\pi\chi}\right)^{1/2} a - l \quad (8)$$

1. Kulkarni, Ch.V.; Wachter, W.; Iglesias-Salto, G.; Engelskirchen, S.; Ahualliac, S. Monoolein: a magic lipid? *Phys. Chem. Chem. Phys.* **2011**, *13*, 3004–3021, doi:10.1039/c0cp01539c2.
2. Turner, D.C.; Wang, Z.-G.; Gruner, S.M.; Mannock, D.A.; McElhaney, R.N. Structural Study of the Inverted Cubic Phases of di- Dodecyl Alkyl- $\beta$ -D-Glucopyranosyl-rac-Glycerol. *J. Phys.* **1992**, *2*, 2039–2063, doi:10.1051/jp2:1992250.
3. Anderson, D.M.; Gruner, S.M.; Leibler, S. Geometrical Aspects of the Frustration in the Cubic Phases of Lyotropic Liquid Crystals. *Proc. Natl. Acad. Sci. USA* **1988**, *85*, 5364–5368.

S3

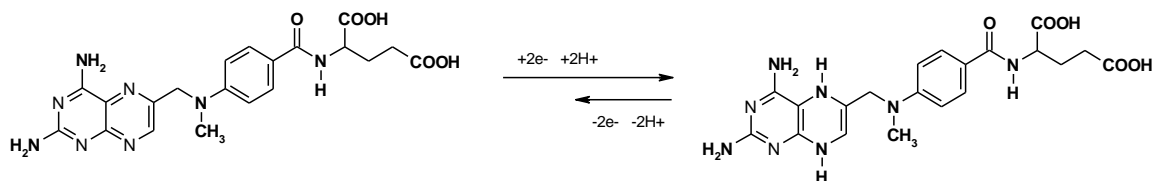

Scheme of the reduction process of methotrexate [1].

1. Pontinha, A.D.R.; Jorge, S.M.A.; Diculescu, V.C.; Vivan, M.; Oliveira-Brett, A.M. Antineoplastic Drug Methotrexate Redox Mechanism Using a Glassy Carbon Electrode. *Electroanalysis* **2012**, *24*, 917–923, doi:10.1002/elan.201100558.

S4

Release profiles of MTX from a cubic phase in pH 7.4 at 25 [A] and 37 °C [B].

S5

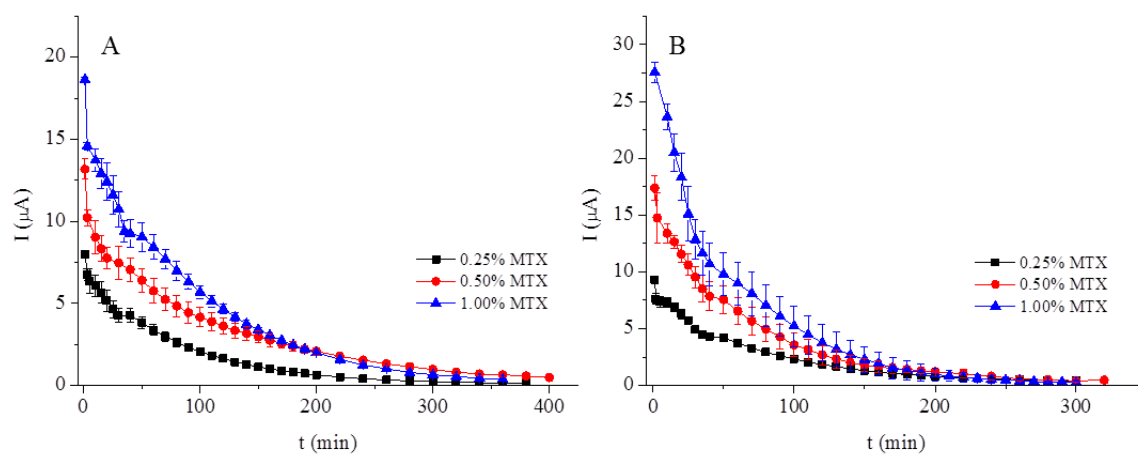

DPV on GC electrode modified with phases without [A] and with [B] magnetic nanoparticles and the release profiles of MTX from LCPs [C] at pH 7.4 at 25 °C.

S6

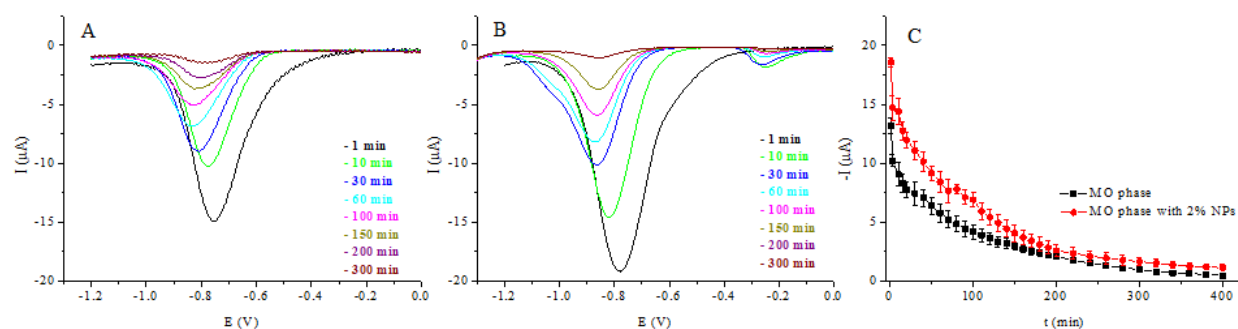

The size [A] and zeta potential [B] of magnetocubosomes containing MTX determined with DLS at 25 °C.

S7

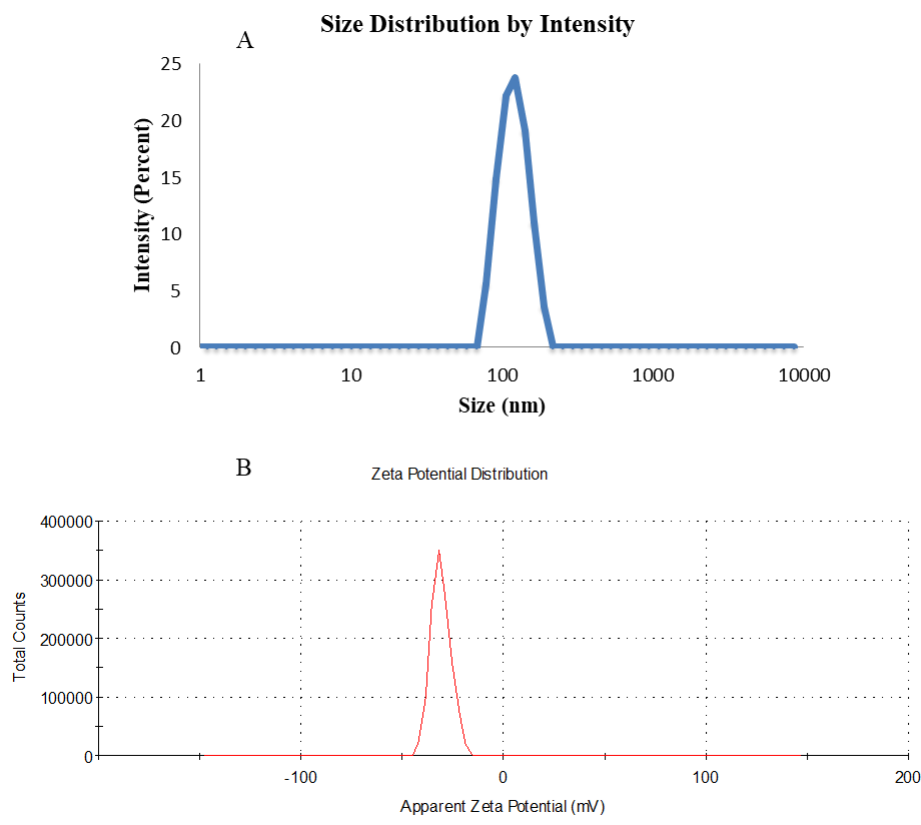

Standard calibration curve for methotrexate based on measurement at 303 nm in 0.1 M phosphate buffer, pH 7.4.

S8

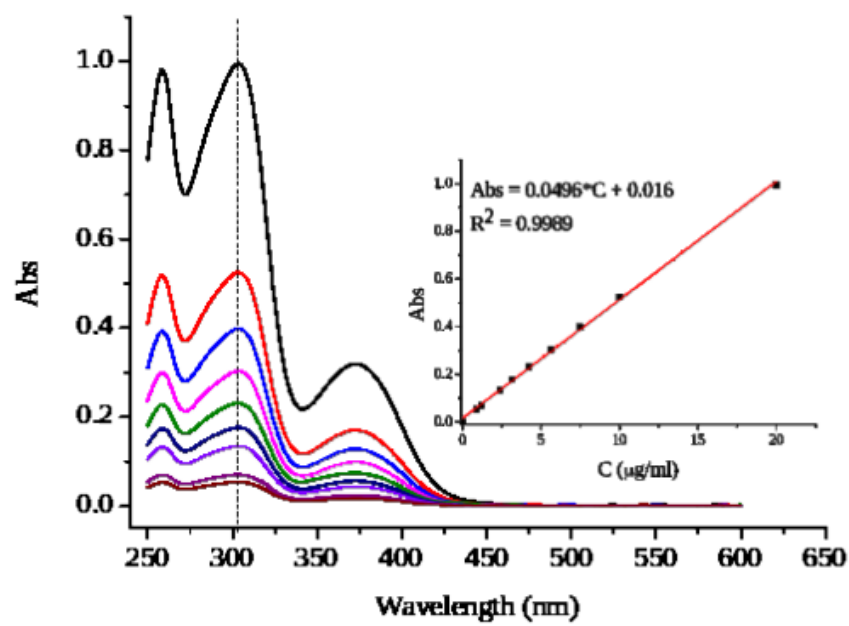

Electron cryo-microscopy images of cubosomes [A] and magnetocubosome [B].

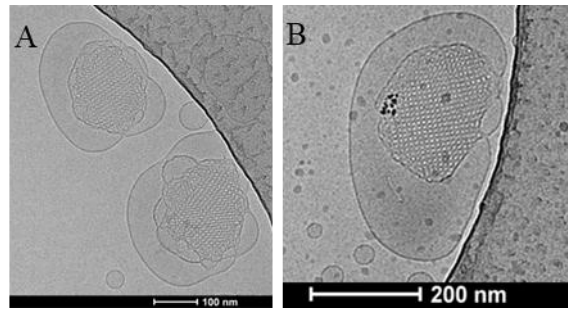

Movement of magnetocubosomes in magnetic field.

<https://www.youtube.com/watch?v=dY5wi2V3GH4>
